# Supplementary material for: Treatment adherence and Associated Factors among Patients With breast Cancer in Ethiopia, systematic review and meta-analysis
Source: Research Square preprint supplement (doi:10.21203/rs.3.rs-6582886/v1), 2025-06-10
Supplement: Supplementary file 2 [file d7928cf548c894c2f0c86589.docx]

| **Table1. PubMed search history** | | |
| --- | --- | --- |
| **Searh** | **Search terms** | **Number of articles** |
| **#1** | ((((Breast cancer[Title]) OR (People with Breast[Title])) OR (Cancer of breast[Title])) OR (Breast malignancy[Title])) OR (Breast cancer[MeSH Terms]) | 10,917 |
| **#2** | ((Ethiopia[Title]) ) OR (Ethiopia[MeSH Terms]) | 266,630 |
| **#3** | (((((((((Treatment adherence[Title]) OR (Chemotherapy adherence[Title])) OR (Hormonal therapy adherence[Title])) OR (endocrine therapy adherence[Title])) OR (Adherence to anticancer medication[Title])) OR (Compliance with chemotherapy regimens[Title])) OR (Compliance with hormonal therapy[Title])) OR (Factors influencing adherence[Title])) OR (Adherence to treatment[Title])) OR (Treatment adherence[MeSH Terms]) | 3,423 |
| **#4** | ((((((Breast cancer[Title]) OR (People with Breast[Title])) OR (Cancer of breast[Title])) OR (Breast malignancy[Title])) OR (Breast cancer[MeSH Terms]) AND ((y_1[Filter]) AND (ffrft[Filter]))) AND (((Ethiopia[Title]) ) OR (Ethiopia[MeSH Terms]) AND ((y_1[Filter]) AND (ffrft[Filter])))) AND ((((((((((Treatment adherence[Title]) OR (Chemotherapy adherence[Title])) OR (Hormonal therapy adherence[Title])) OR (endocrine therapy adherence[Title])) OR (Adherence to anticancer medication[Title])) OR (Compliance with chemotherapy regimens[Title])) OR (Compliance with hormonal therapy[Title])) OR (Factors influencing adherence[Title])) OR (Adherence to treatment[Title])) OR (Treatment adherence[MeSH Terms]) AND ((y_1[Filter]) AND (ffrft[Filter]))) | 0 |
| **Google scholar** |  | 20,100 |
